# Supplementary material for: Competition among Flavescence Dorée Phytoplasma Strains in the Experimental Insect Vector Euscelidius variegatus
Source: MDPI journal article supplement (doi:10.3390/insects14070575), 2023-06-23
Supplement: s1 [file s1]

## Amount of phytoplasma cells measured in each single sample

Amount of *Flavescence dorée* phytoplasma (FDp) cells (either FD-C or FD-D strains) in each single sample, expressed as FDp Genome Units (GU)/ng of insect DNA, measured in insects collected after 'Mixed acquisition by feeding' experiments. SEM: standard error of the mean

| Single infected insects |            |             |            | Mixed infected insects |            |             |            |
|-------------------------|------------|-------------|------------|------------------------|------------|-------------|------------|
| FD-C Bodies             | FD-C Heads | FD-D Bodies | FD-D Heads | FD-C Bodies            | FD-C Heads | FD-D Bodies | FD-D Heads |
| 2,67E+03                | 3,09E+04   | 6,98E+02    | 1,34E+04   | 9,76E+02               | 2,17E+04   | 1,13E+04    | 1,37E+04   |
| 1,70E+04                | 3,47E+02   | 1,76E+04    | 4,04E+05   | 1,71E+02               | 1,87E+03   | 1,35E+04    | 4,32E+04   |
| 9,63E+02                | 7,09E+03   | 5,86E+04    | 3,74E+04   | 6,44E+03               | 2,65E+04   | 5,71E+03    | 3,01E+03   |
| 6,77E+03                | 8,41E+04   | 2,60E+04    | 6,00E+05   | 1,08E+03               | 2,52E+03   | 5,89E+03    | 6,71E+03   |
| 8,59E+03                | 1,34E+05   | 1,38E+04    | 2,74E+04   | 1,70E+03               | 1,37E+04   | 1,03E+04    | 3,80E+02   |
| 6,43E+04                | 3,74E+02   | 4,45E+03    | 1,87E+05   | 1,47E+04               | 2,57E+04   | 1,13E+04    | 9,92E+03   |
| 2,40E+03                | 8,61E+03   | 9,74E+03    | 1,32E+04   | 1,41E+02               | 1,94E+02   | 7,13E+02    | 5,05E+02   |
| 3,99E+02                | 6,20E+03   | 2,67E+03    | 3,28E+04   | 2,38E+02               | 2,16E+03   | 2,70E+02    | 7,80E+01   |
| 4,15E+03                | 2,59E+03   | 3,71E+03    | 1,06E+05   | 5,87E+02               | 2,67E+03   | 7,66E+02    | 3,22E+03   |
| 1,68E+04                | 6,53E+04   | 9,30E+02    | 5,26E+04   | 6,20E+01               | 2,67E+03   | 2,39E+02    | 2,28E+02   |
| 3,26E+03                | 9,10E+03   | 4,56E+02    | 3,69E+03   | 2,23E+03               |            | 3,21E+02    | 2,28E+02   |
| 2,30E+01                | 5,77E+04   | 5,84E+03    | 8,89E+02   | 8,25E+02               |            | 4,22E+02    |            |
| 1,55E+04                | 7,46E+04   | 7,40E+01    | 1,56E+04   | 1,29E+03               |            | 2,10E+03    |            |
| 4,11E+03                | 2,55E+04   | 3,32E+03    | 1,24E+04   | 1,68E+02               |            | 1,04E+03    |            |
| 4,85E+04                | 5,50E+04   | 4,60E+01    | 4,06E+03   | 9,11E+02               |            | 4,15E+02    |            |
| 1,03E+03                | 2,91E+04   | 1,21E+03    | 1,66E+04   | 9,91E+03               |            | 4,96E+03    |            |
| 4,04E+03                | 9,60E+01   | 1,90E+03    | 3,55E+03   | 1,20E+02               |            | 2,68E+02    |            |
| 4,59E+03                | 4,48E+04   | 2,94E+03    | 7,45E+03   | 1,04E+03               |            | 1,73E+03    |            |
| 5,14E+03                | 3,29E+04   | 9,14E+03    | 2,90E+02   | 1,46E+02               |            | 1,06E+02    |            |
| 6,02E+03                | 8,70E+01   | 1,30E+02    | 3,87E+04   | 7,30E+01               |            | 4,27E+02    |            |
| 2,89E+03                | 1,04E+02   | 3,29E+02    | 5,35E+03   |                        |            | 4,84E+02    |            |
| 6,61E+02                | 7,39E+04   | 3,80E+03    | 3,69E+03   |                        |            |             |            |
| 4,76E+02                | 5,53E+03   | 6,10E+02    | 1,08E+03   |                        |            |             |            |
| 1,93E+03                | 1,60E+04   | 2,02E+03    | 5,95E+03   |                        |            |             |            |
| 5,77E+02                | 9,83E+02   | 2,14E+03    | 4,05E+04   |                        |            |             |            |
| 1,50E+03                | 2,16E+03   | 6,90E+03    | 1,50E+04   |                        |            |             |            |
| 4,44E+03                | 1,87E+04   | 7,10E+03    | 1,19E+05   |                        |            |             |            |
| 2,42E+04                | 1,75E+04   | 5,70E+02    | 5,55E+03   |                        |            |             |            |
| 4,71E+03                | 7,34E+04   | 1,22E+04    | 1,68E+05   |                        |            |             |            |
| 1,80E+03                | 1,58E+03   | 2,44E+02    | 1,39E+05   |                        |            |             |            |
| 2,22E+03                | 1,79E+04   | 2,72E+03    | 2,94E+03   |                        |            |             |            |
| 1,84E+02                | 6,10E+01   | 1,08E+02    | 8,75E+04   |                        |            |             |            |
| 1,78E+03                | 1,12E+04   | 3,08E+02    | 1,49E+05   |                        |            |             |            |
| 9,54E+03                | 2,38E+04   | 9,45E+01    | 1,18E+05   |                        |            |             |            |
| 3,11E+03                | 1,76E+04   | 1,18E+02    | 8,75E+04   |                        |            |             |            |
| 3,63E+02                | 5,26E+02   | 1,74E+03    | 7,95E+04   |                        |            |             |            |
| 1,96E+03                | 1,95E+03   | 3,54E+03    | 4,00E+04   |                        |            |             |            |
| 2,09E+03                | 1,53E+04   | 2,62E+02    | 1,44E+04   |                        |            |             |            |
| 1,35E+03                | 7,80E+02   | 5,35E+01    | 1,12E+03   |                        |            |             |            |
| 7,67E+03                | 2,22E+03   | 8,60E+01    | 4,92E+03   |                        |            |             |            |
| 1,30E+04                | 6,41E+03   | 1,44E+02    | 4,92E+03   |                        |            |             |            |
| 4,36E+03                | 3,20E+04   |             |            |                        |            |             |            |
| 1,81E+03                | 1,45E+02   |             |            |                        |            |             |            |
| 2,22E+03                | 9,80E+03   |             |            |                        |            |             |            |
| 4,08E+03                | 1,36E+04   |             |            |                        |            |             |            |
| 1,20E+03                | 9,45E+03   |             |            |                        |            |             |            |
| 7,60E+02                | 4,43E+03   |             |            |                        |            |             |            |
| 9,65E+02                | 5,30E+01   |             |            |                        |            |             |            |
| 8,00E+03                | 9,33E+03   |             |            |                        |            |             |            |
| 4,04E+02                | 8,80E+01   |             |            |                        |            |             |            |
| 4,41E+01                | 4,28E+03   |             |            |                        |            |             |            |
|                         | 2,41E+04   |             |            |                        |            |             |            |
|                         | 2,78E+02   |             |            |                        |            |             |            |
|                         | 1,70E+01   |             |            |                        |            |             |            |
|                         | 2,08E+05   |             |            |                        |            |             |            |
|                         | 3,55E+04   |             |            |                        |            |             |            |
|                         | 6,75E+04   |             |            |                        |            |             |            |
|                         | 1,24E+04   |             |            |                        |            |             |            |

|              | Single infected insects |            |             |            | Mixed infected insects |            |             |            |
|--------------|-------------------------|------------|-------------|------------|------------------------|------------|-------------|------------|
|              | FD-C Bodies             | FD-C Heads | FD-D Bodies | FD-D Heads | FD-C Bodies            | FD-C Heads | FD-D Bodies | FD-D Heads |
| MEAN         | 6,40E+03                | 2,43E+04   | 5,08E+03    | 6,51E+04   | 2,14E+03               | 9,97E+03   | 3,44E+03    | 7,38E+03   |
| DEV STANDARD | 1,15E+04                | 3,69E+04   | 1,02E+04    | 1,15E+05   | 3,83E+03               | 1,08E+04   | 4,46E+03    | 1,27E+04   |
| SEM          | 1,61E+03                | 4,85E+03   | 1,59E+03    | 1,79E+04   | 8,57E+02               | 3,43E+03   | 9,73E+02    | 3,84E+03   |

Amount of Flavescence dorée phytoplasma (FDp) cells (either FD-C or FD-D strains) in each single sample, expressed as FDp Genome Units (GU)/ng of plant DNA, measured in plants collected after five and seven weeks post inoculation (wpi) by insects after ‘mixed acquisition by feeding’ experiment. SEM: standard error of the mean

| Single infected plant_5wpi |          | Single infected plant_7wpi |          | Mixed infected plant_7wpi |          |
|----------------------------|----------|----------------------------|----------|---------------------------|----------|
| FD-C                       | FD-D     | FD-C                       | FD-D     | FD-C                      | FD-D     |
| 1,77E+05                   | 1,36E+05 | 1,50E+05                   | 2,54E+05 | 1,27E+04                  | 9,32E+03 |
| 3,90E+03                   | 1,12E+05 | 3,90E+01                   | 8,21E+05 |                           |          |
| 5,81E+05                   | 4,26E+04 | 6,90E+01                   | 1,04E+05 |                           |          |
| 7,07E+04                   | 3,54E+05 | 2,80E+01                   | 2,21E+05 |                           |          |
| 2,39E+05                   | 7,03E+05 | 2,75E+05                   | 1,08E+06 |                           |          |
| 1,86E+05                   | 4,19E+05 | 3,43E+05                   | 6,70E+05 |                           |          |
| 1,45E+05                   | 7,97E+04 | 3,20E+01                   | 1,14E+04 |                           |          |
| 4,79E+03                   | 1,34E+05 | 2,23E+05                   | 6,05E+05 |                           |          |
| 1,18E+05                   |          | 8,67E+05                   |          |                           |          |
| 1,07E+05                   |          | 3,50E+01                   |          |                           |          |
| 2,59E+05                   |          | 1,35E+06                   |          |                           |          |
| 1,03E+05                   |          | 5,27E+05                   |          |                           |          |
| 1,44E+05                   |          | 4,94E+05                   |          |                           |          |
| 3,27E+05                   |          | 6,30E+01                   |          |                           |          |
| 1,60E+02                   |          | 2,01E+02                   |          |                           |          |
| 2,65E+05                   |          | 1,27E+02                   |          |                           |          |
| 1,10E+02                   |          | 3,52E+05                   |          |                           |          |
| 6,21E+04                   |          | 8,60E+04                   |          |                           |          |
| 4,35E+04                   |          | 5,62E+05                   |          |                           |          |
| 2,92E+02                   |          | 5,57E+05                   |          |                           |          |
| 1,36E+05                   |          | 2,76E+02                   |          |                           |          |
| 1,91E+05                   |          | 7,72E+02                   |          |                           |          |
| 2,98E+05                   |          | 3,72E+02                   |          |                           |          |
| 1,99E+05                   |          | 3,59E+05                   |          |                           |          |
|                            |          | 7,88E+02                   |          |                           |          |
|                            |          | 1,88E+05                   |          |                           |          |
|                            |          | 8,30E+01                   |          |                           |          |
|                            |          | 9,07E+05                   |          |                           |          |
|                            |          | 1,40E+06                   |          |                           |          |
|                            |          | 7,70E+05                   |          |                           |          |
|                            |          | 1,61E+03                   |          |                           |          |
|                            |          | 5,70E+05                   |          |                           |          |

|              | Single infected plant_5wpi |          | Single infected plant_7wpi |          | Mixed infected plant_7wpi |          |
|--------------|----------------------------|----------|----------------------------|----------|---------------------------|----------|
|              | FD-C                       | FD-D     | FD-C                       | FD-D     | FD-C                      | FD-D     |
| MEAN         | 1,53E+05                   | 2,48E+05 | 3,12E+05                   | 4,71E+05 | 1,27E+04                  | 9,32E+03 |
| DEV STANDARD | 1,35E+05                   | 2,27E+05 | 3,96E+05                   | 3,79E+05 |                           |          |
| SEM          | 2,75E+04                   | 8,04E+04 | 7,01E+04                   | 1,34E+05 |                           |          |
